# Supplementary material for: Spotting and designing promiscuous ligands for drug discovery
Source: Royal Society of Chemistry journal article supplement (doi:10.1039/c5cc07506h), 2015-11-25
Supplement: c5cc07506h1.pdf [file c5cc07506h1.pdf]

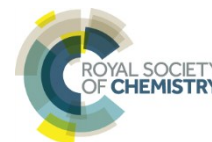

## Chemical Communications

### Electronic Supplementary Information

## Spotting and designing promiscuous ligands for drug discovery

P. Schneider,<sup>a,b</sup> M. Röthlisberger,<sup>a</sup> D. Reker<sup>a</sup> and G. Schneider<sup>a</sup>

### Experimental

**Data collection.** We extracted all compounds and activity data for machine learning from ChEMBL19 ([www.ebi.ac.uk/chembl](http://www.ebi.ac.uk/chembl))<sup>9</sup>. Target IDs were manually assigned to target classes. For flagging of potential false-positives we used a list of 106 substructures (inSili.com LLC, Zurich, Switzerland) and counted cumulative flags for each compound.

**Neural network model.** We trained a feedforward network using own software, as described previously.<sup>4</sup> The nonlinear network function contained weight vectors  $\mathbf{w}$  and  $\mathbf{v}$ , and the neurons' bias values  $\mathbf{u}$  and  $\theta$ :

$$\text{Prediction score} = f(x) = \text{sigm} \left( \sum_{d=1}^{HID} v_d \left( \text{sigm} \left( \sum_{i=1}^{IN} w_{hi} x_{hi,i} + v_h \right) \right) + \theta \right),$$

where *sigm* is the neuron activation function, and  $\mathbf{x}$  the input values ( $IN = 210$ ; CATS2 descriptor)<sup>11</sup>. The number of hidden neurons *HID* was varied (Table 1). The model was optimized with a (1,500) evolution strategy and adaptive stepsize adjustment.<sup>1</sup>

**Self-organizing map.** We used the MOLMAP software (inSili.com LLC, Zürich, Switzerland) for data projection onto a toroidal self-organizing map containing 20×18 clusters, with 2×10<sup>6</sup> update cycles, and the Gaussian neighbourhood kernel with linearly decaying update radius ( $\tau_{\text{initial}} = 10$ ).<sup>2</sup>

**Synthesis and analytics.** Building blocks and solvents were purchased from Sigma-Aldrich ([www.sigmaaldrich.com](http://www.sigmaaldrich.com)) and used without further purification. Proton and carbon nuclear magnetic resonance (<sup>1</sup>H and <sup>13</sup>C NMR) spectra were recorded on a Bruker Avance 400 (400 and 100 MHz, respectively). Analytical LC-MS was carried out in a Hitachi LaChrom Ultra – Advion CMS system, equipped with a Nucleodur C<sub>18</sub> HTec column, under a 5-50% gradient of acetonitrile: H<sub>2</sub>O (+0.1% formic acid in each solvent), and a total flow rate of 0.5 mL/min. Preparative HPLC was carried out on a Shimadzu LC-8A system, coupled to a Nucleodur 100-5 C<sub>18</sub> HTec column and a SPD-20A UV/Vis detector. High-resolution mass spectrometry (HRMS) analysis was performed in positive ion mode on a Bruker Daltonics maXis ESI-QTOF device. Melting point (*mp*) analysis was done on a Büchi M-560 system.

We synthesized compound **1** by reductive amination.<sup>3</sup> 1-methyl-1*H*-imidazole-2-carbaldehyde (0.5 mmol, 55.89 mg)

and 1-bis(4-fluorophenyl)methylpiperazine (0.5 mmol, 148.07 mg) were dissolved in 5 mL 1,2-dichloroethane and stirred under nitrogen for 19 hours at room temperature. Sodium triacetoxyborohydride (0.7 mmol, 152.52 mg) was added, and the pH was adjusted to 4 with acetic acid. The reaction was stirred for another 29 hours and monitored by HPLC-MS, then quenched with 5 mL of saturated NaHCO<sub>3</sub>. The crude product was extracted with three times 15 mL diethyl ether, washed with 30 mL brine, dried over MgSO<sub>4</sub> and filtered. The solvent was removed under a stream of nitrogen and the product was purified by preparative HPLC. White-brown amorphous solid (purity: 95%, 7.8 mg, 4%; re-synthesis of 46 mg, 6%), *mp* = 49 °C. <sup>1</sup>H-NMR (400 MHz, chloroform-*d*):  $\delta$  7.36 (dd, *J* = 8.5, 5.3 Hz, 4H), 7.11 (s, 1H), 7.03-6.91 (m, 5H), 4.36 (s, 1H), 4.00 (s, 2H), 3.85 (s, 3H), 2.83 (s, 4H), 2.60 (s, 1H) ppm. <sup>13</sup>C NMR (101 MHz, chloroform-*d*):  $\delta$  163.23, 160.78, 136.88, 129.30 (d, *J* = 7.9 Hz), 124.37, 122.79, 115.69 (d, *J* = 21.4 Hz), 74.09, 52.35, 51.39, 50.30, 34.22 ppm. HRMS (C<sub>22</sub>H<sub>25</sub>F<sub>2</sub>N<sub>4</sub>) [M+H]<sup>+</sup> calc. 383.2042 Da, found 383.2042 Da.

**Dynamic light scattering.** Dynamic light scattering (90Plus Particle Size Analyzer, Brookhaven Instruments Corp., USA) was used to determine the colloidal aggregation potential of compound **1** in aqueous concentrations of 0.3-1.0 mM. For each concentration, the correlation function was recorded after 0, 15, 30, 45 and 60 minutes. Measurements were performed at 25 °C, with default settings for water, and the dust filter parameter was set to 50.

**Activity determination.** All ligand binding assays were performed by Cerep (Celle l'Évescault, France) on a fee-for-service basis. The assay protocols can be found at URL: [www.cerep.fr](http://www.cerep.fr).

### References

- 1 G. Schneider, P. Wrede, *Prog. Biophys. Mol. Biol.* 1998, **70**, 175-222; G. Schneider, J. Schuchhardt, P. Wrede, *Biol. Cybern.* 1996, **74**, 203-207.
- 2 P. Schneider, Y. Tanrikulu, G. Schneider, *Curr. Med. Chem.* 2009, **16**, 258-266.
- 3 A. F. Abdel-Magid, S. J. Mehrman, *Org. Process Res. Dev.* 2006, **10**, 971-1031.
